# Supplementary material for: Poly(ethylene-co-propylene)/poly(ethylene glycol) elastomeric hydrogels with thermoreversibly cross-linked networks
Source: Royal Society of Chemistry journal article supplement (doi:10.1039/c9py00824a), 2019-01-01
Supplement: c9py00824a1.pdf [file c9py00824a1.pdf]

## Poly(ethylene-*co*-propylene)/poly(ethylene glycol) elastomeric hydrogels with thermoreversibly cross-linked networks

Zongke He, Hui Niu\*, Nan Zheng, Shuhui Liu, Yang Li\*

Department of Polymer Science and Engineering, School of Chemical Engineering, Dalian University of Technology, Dalian 116024, China

### Supporting information

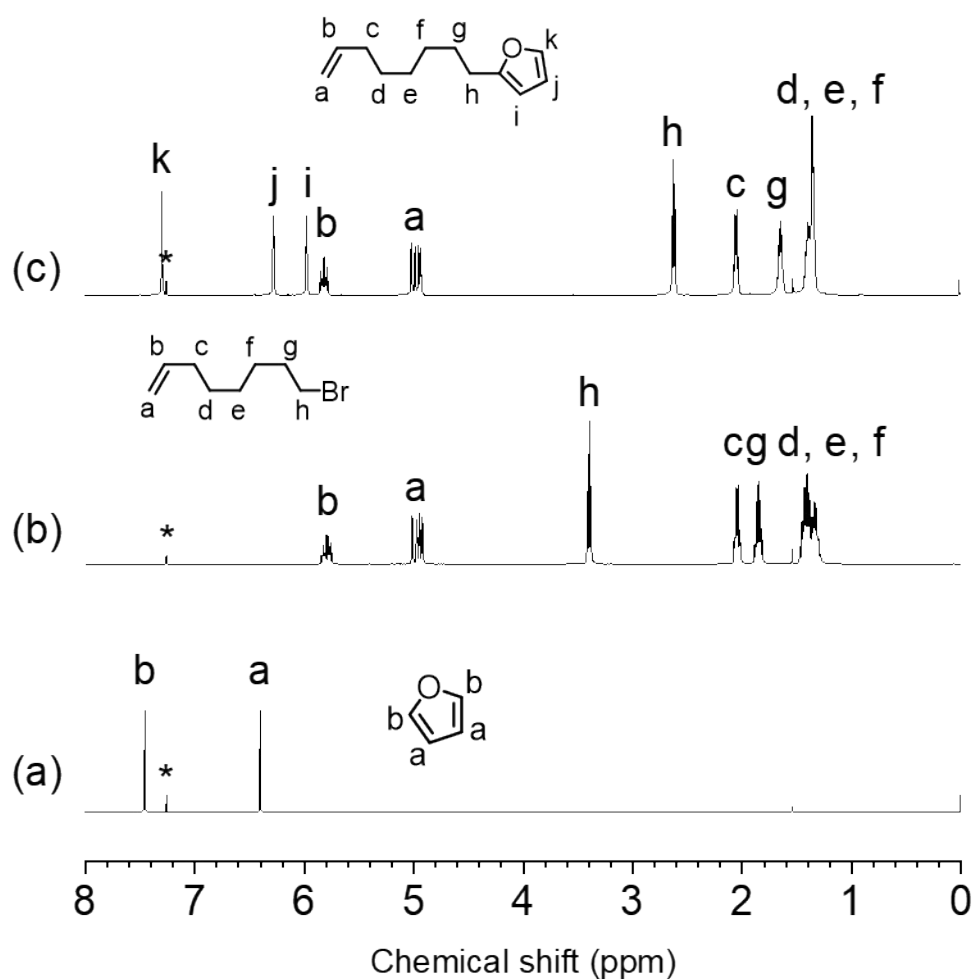

Figure S1 <sup>1</sup>H-NMR spectra of (a) furan, (b) 8-Br-1-octane, and (c) 8-furyl-1-octane

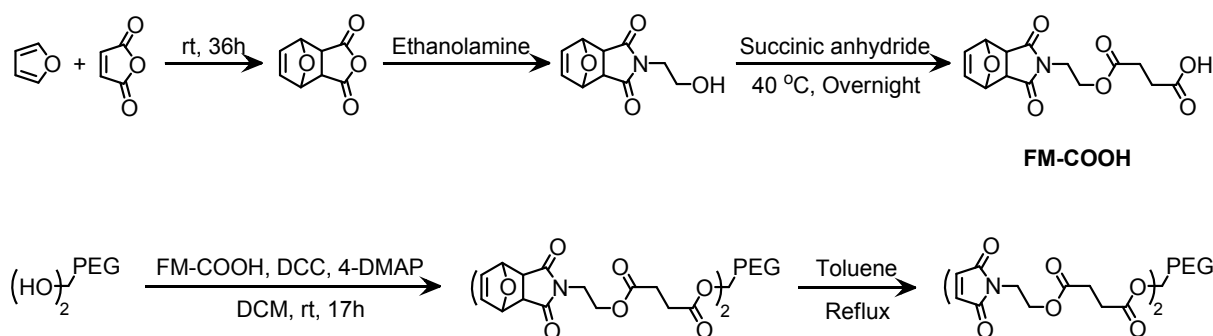

**Scheme S1** Synthesis route of bis-maleimide-capped poly(ethylene glycol) ((MI)<sub>2</sub>PEG)

### Synthesis of FM-COOH:

#### 4-(2-(((3-acetyl-7-oxabicyclo[2,2,1]-hept-5-en-2-yl)carbonyl)amino)ethoxy)-4-oxobutanoic acid

The synthesis of 4-(2-Hydroxy-ethyl)-10-oxa-4-aza-tricyclo[5.2.1.0<sup>2,6</sup>]dec-8-ene-3,5-dione was performed according to literature <sup>1</sup>. 4-(2-Hydroxy-ethyl)-10-oxa-4-aza-tricyclo[5.2.1.0<sup>2,6</sup>]dec-8-ene-3,5-dione (10g, 47.80mmol) was dissolved in 300 ml 1,4-dioxane in a round bottom flask equipped with magnetic stirrer. Subsequently, trimethylamine(25.30 g, 250 mmol), DMAP(11.68 g, 95.6 mmol) and succinic anhydride(19.14 g, 191.2 mmol) were added and the reaction mixture was stirred at 40 °C overnight. The solution was washed with 1M HCl, extracted with DCM, and dried over Na<sub>2</sub>SO<sub>4</sub>, the solvent was removed under reduced and the residue was recrystallized from ethanol to give a white crystal. <sup>1</sup>H-NMR (400 MHz, CDCl<sub>3</sub>, Figure 1c): δ = 6.51 (2H, s, CH=CH, bridge protons), 5.26 (2H, s, -CHO, bridge-head protons), 4.26 (2H, t, NCH<sub>2</sub>CH<sub>2</sub>OC=O), 3.75 (2H, t, NCH<sub>2</sub>CH<sub>2</sub>OC=O), 2.88 (2H, s, CH=CH, bridge protons), 2.67–2.54 (4H, m, C=OCH<sub>2</sub>CH<sub>2</sub>C=OOH).

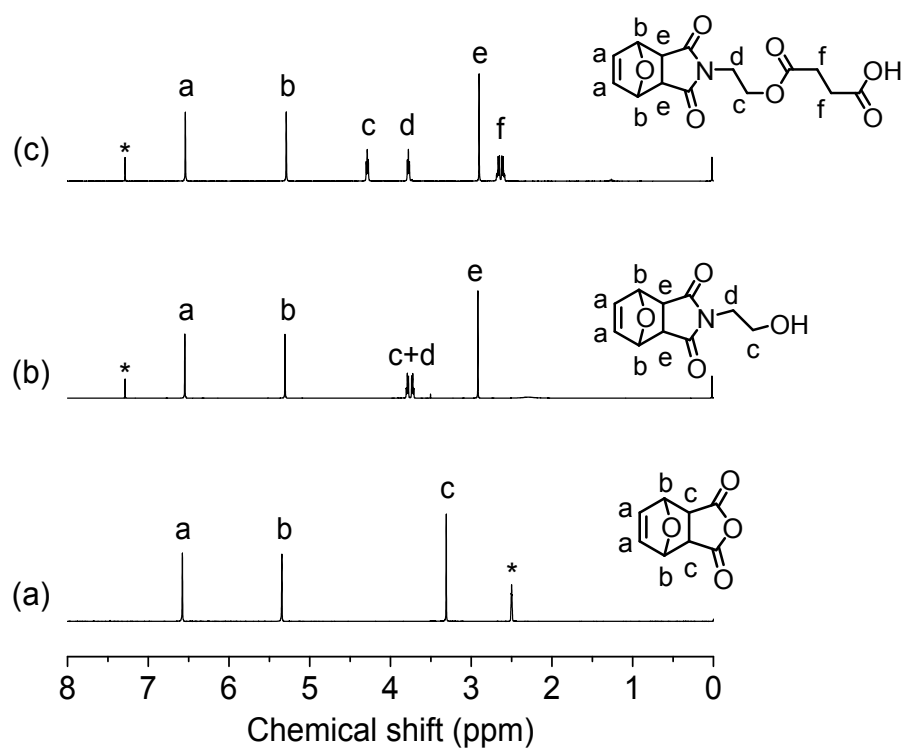

**Figure S2**  $^1\text{H-NMR}$  spectra of (a) Maleic anhydride, (b) 4-(2-Hydroxy-ethyl)-10-oxa-4-azatricyclo[5.2.1.0<sup>2,6</sup>]dec-8-ene-3,5-dione, and (c) FM-COOH

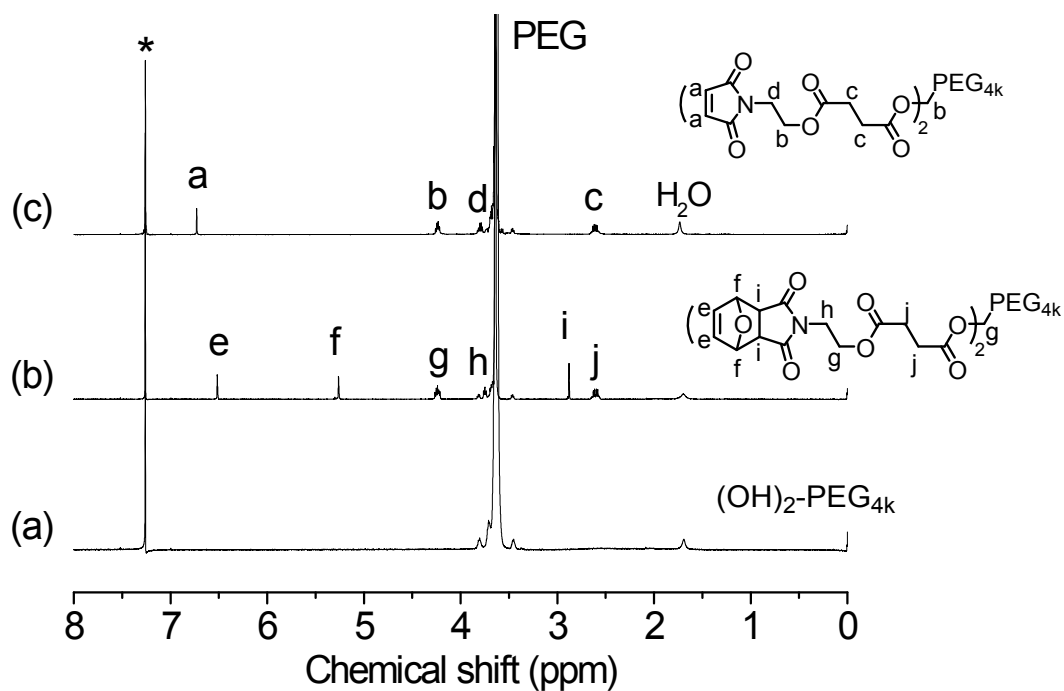

**Figure S3**  $^1\text{H}$ -NMR spectra of (a)  $(\text{OH})_2\text{-PEG}_{4k}$ , (b) furan protected  $(\text{MI})_2\text{-PEG}_{4k}$  and (c)  $(\text{MI})_2\text{-PEG}_{4k}$

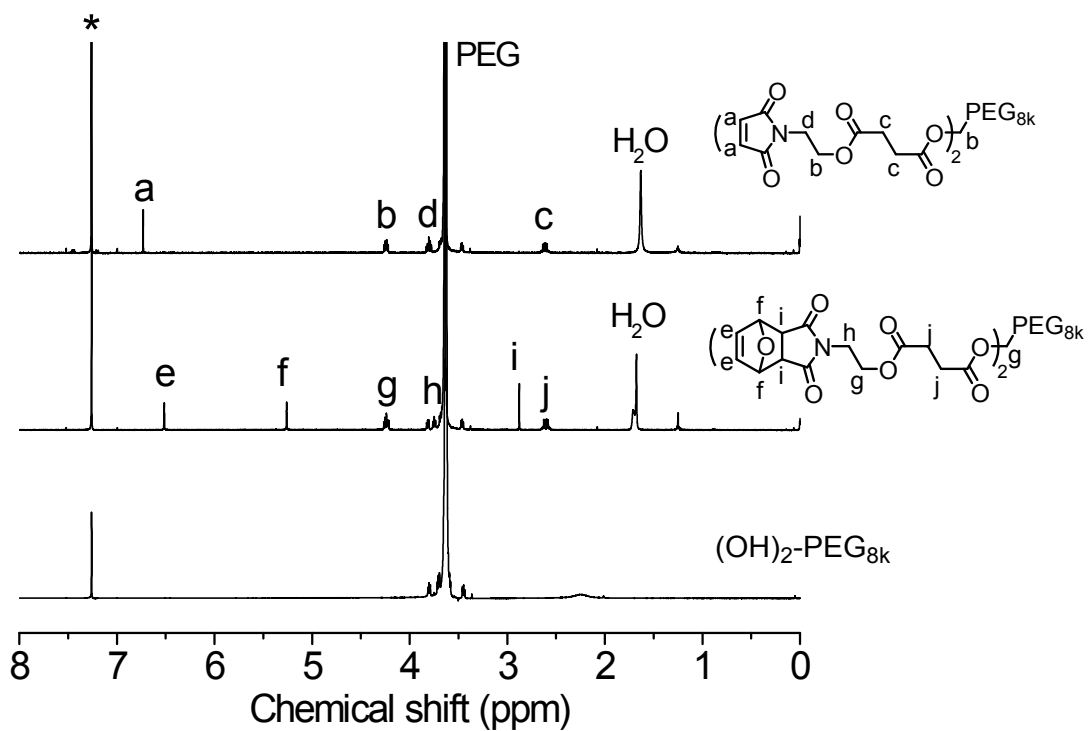

**Figure S4**  $^1\text{H}$ -NMR spectra of (a)  $(\text{OH})_2\text{-PEG}_{8k}$ , (b) furan protected  $(\text{MI})_2\text{-PEG}_{8k}$  and (c)  $(\text{MI})_2\text{-PEG}_{8k}$

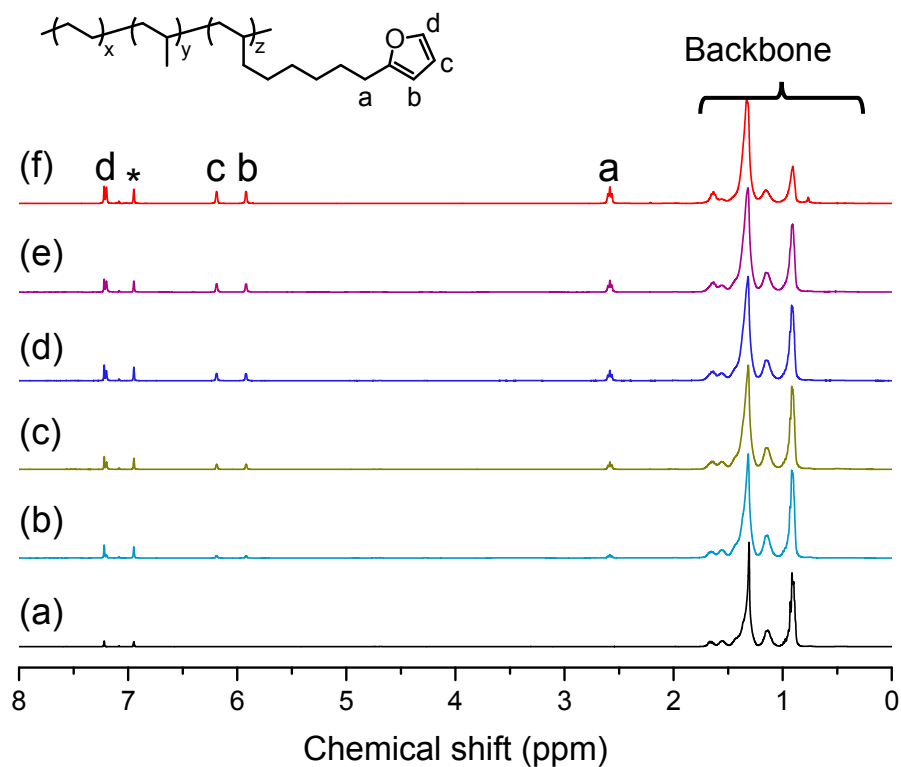

**Figure S5**  $^1\text{H}$ -NMR spectra of (a) E/P copolymer (run 1) and E/P/FO terpolymers containing (b) 1.4 mol%, (c) 3.3 mol%, (d) 4.6 mol%, (e) 5.5 mol%, (f) 10.7 mol% (solvent: 1,2-dichlorobenzene- $d_4$ , 120 °C)

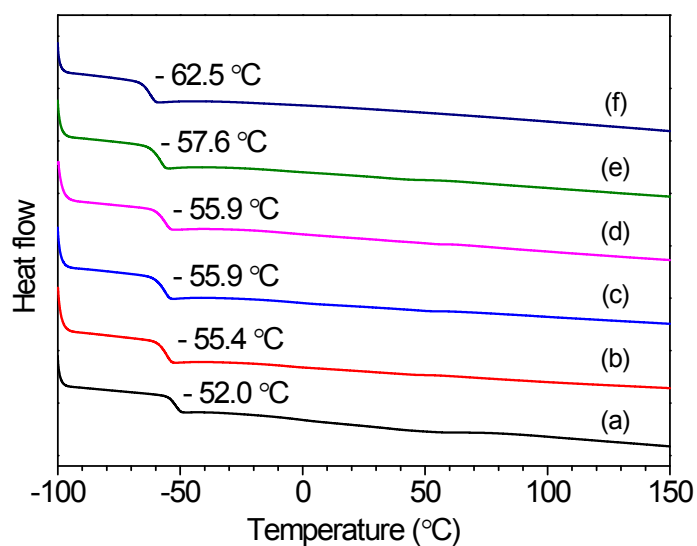

**Figure S6** DSC curves of the (a) E/P copolymer (run 1 in Table 1), E/P/FO terpolymers containing (b) 1.4 mol%, (c) 3.3 mol%, (d) 4.6 mol%, (e) 5.5 mol%, (f) 10.7 mol% of FO units (runs 2–6 in Table 1) with the feeding ratio of E/P = 1 in gas

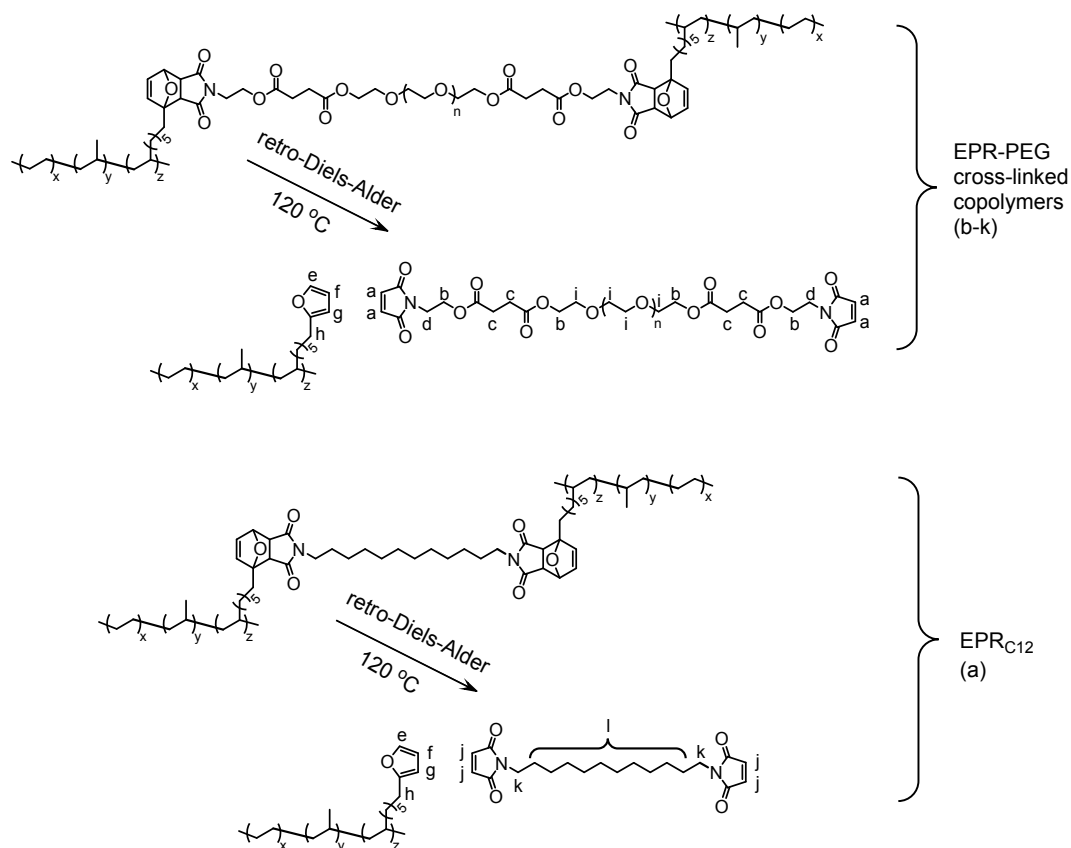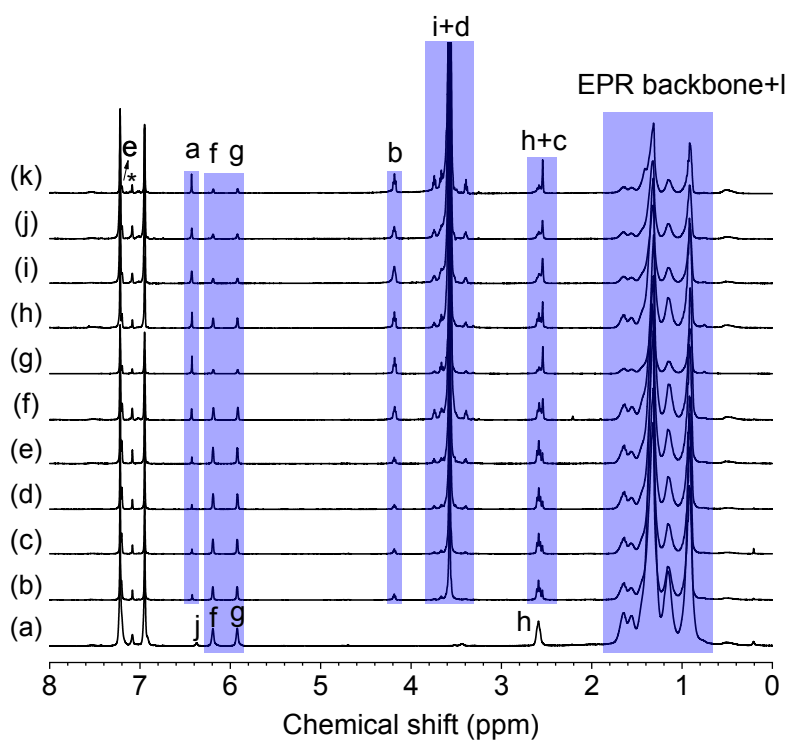

**Figure S7** <sup>1</sup>H-NMR spectra of (a) EPR<sub>C12</sub>, heat-degraded sample (b) 2k02, (c) 4k02, (d) 8k01, (e) 8k02, (f) 8k05, (g) 2k20, (h) 4k10, (i) 4k20, (j) 8k10 and (k) 8k20 in Table 2 at 120 °C for 5 min (solvent: 1,2-dichlorobenzene-*d*<sub>4</sub>, 120 °C)

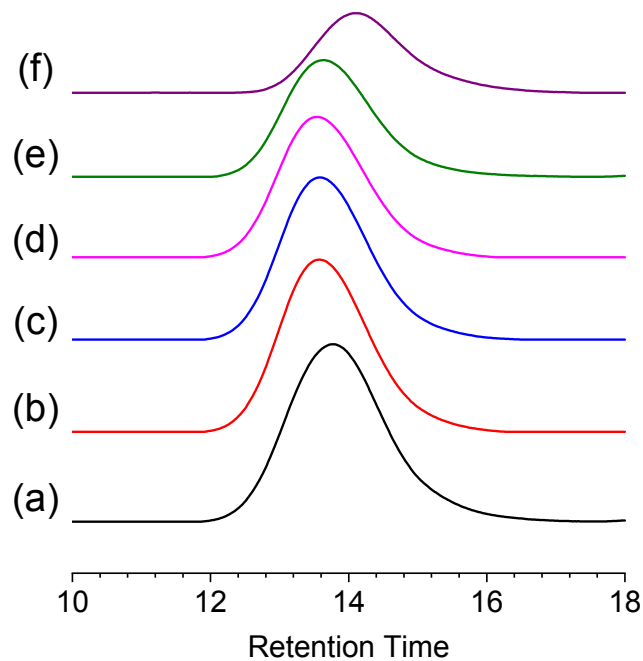

**Figure S8** GPC curves of the (a) E/P copolymer (run 1 in Table 1), E/P/FO terpolymers containing (b) 1.4 mol%, (c) 3.3 mol%, (d) 4.6 mol%, (e) 5.5 mol%, (f) 10.7 mol% of FO units (runs 2–6 in Table 1) with the feeding ratio of E/P = 1 in gas

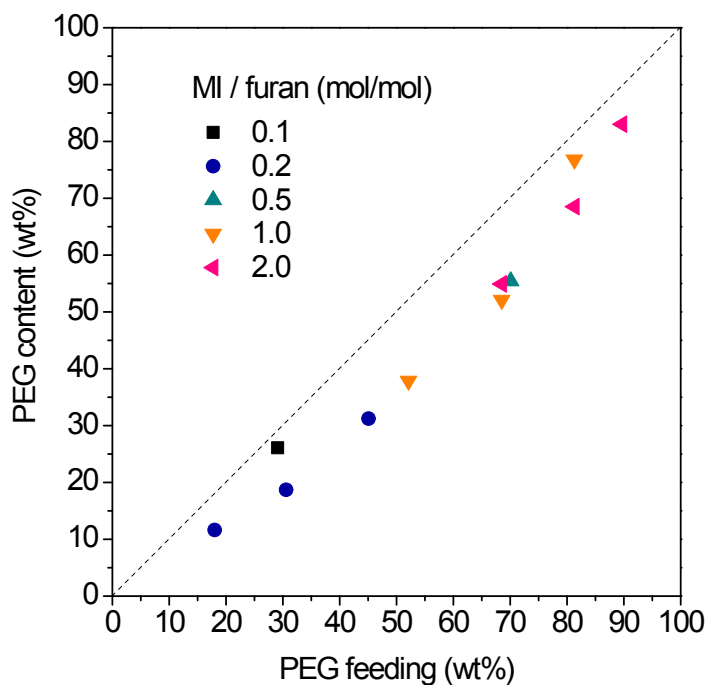

**Figure S9** The relationship of the PEG feeding and incorporation in the DA reaction

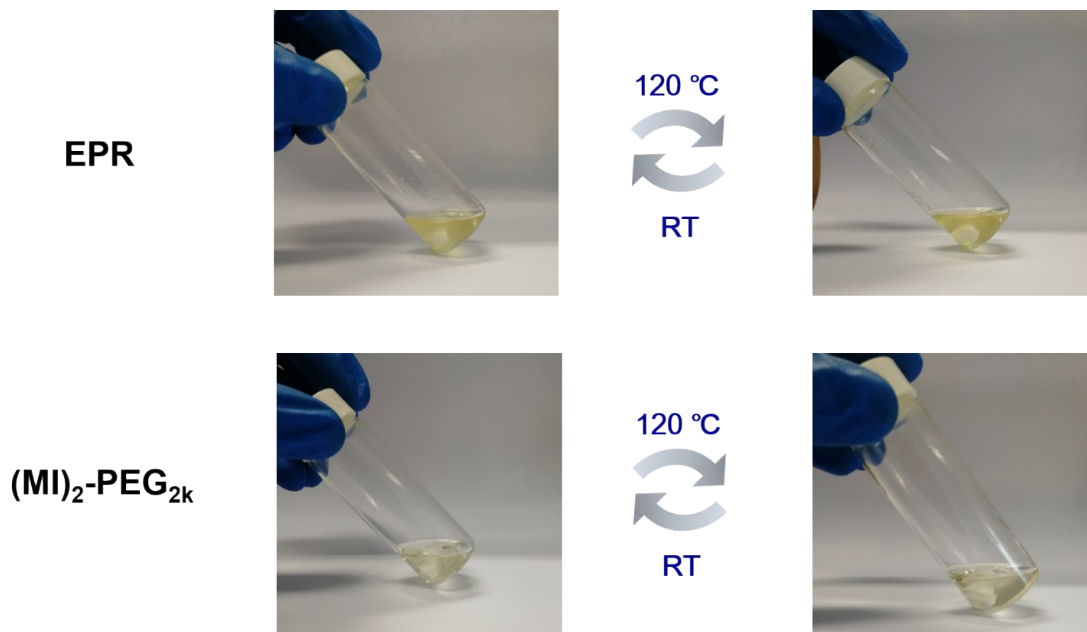

**Figure S10** Images of EPR and  $(MI)_2\text{-PEG}_{2k}$  solutions at room temperature and 120 °C (5 wt% of polymer in 1,2-dichlorobenzene)

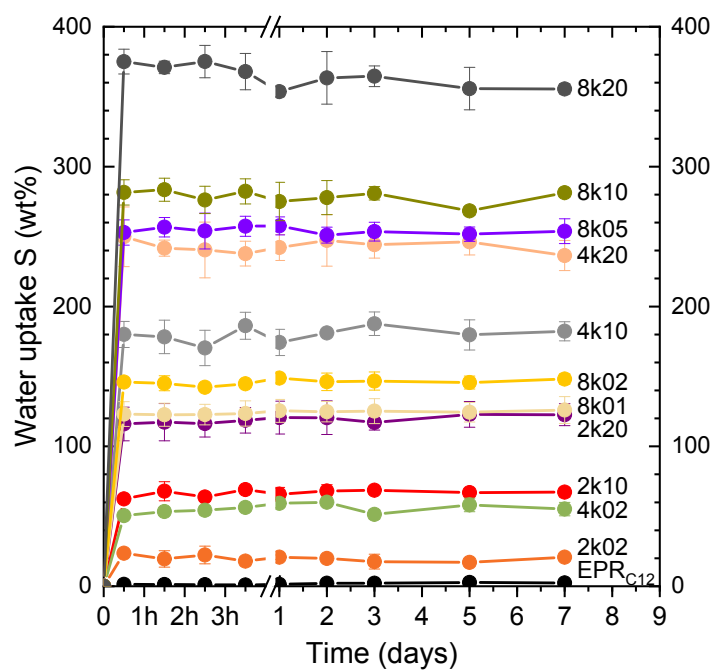

**Figure S11** Swelling ratio as a function of time for EPR<sub>C12</sub> and elastomer hydrogel samples in Table 2



**Table S1** Tensile test results for elastomer hydrogels in dry and hydrogel forms

| Samples            | Strain at break, $\varepsilon_b$<br>(%) | Stress at break, $\sigma_b$<br>(Mpa) | Young's modulus, $E$<br>(Mpa) |
|--------------------|-----------------------------------------|--------------------------------------|-------------------------------|
| 2k02               | 178.4±20.9                              | 0.76±0.02                            | 0.84±0.07                     |
| 4k02               | 240.2±24.3                              | 1.12±0.14                            | 0.94±0.06                     |
| 8k01               | 384.3±45.8                              | 4.23±0.38                            | 20.20±1.60                    |
| 8k02               | 295.1±24.9                              | 4.82±0.07                            | 23.27±0.40                    |
| 8k05               | 121.8±21.0                              | 6.09±0.47                            | 26.04±3.25                    |
| 2k02(H)            | 212.7±13.8                              | 0.78±0.02                            | 0.65±0.03                     |
| 4k02(H)            | 355.1±26.7                              | 1.12±0.11                            | 0.67±0.06                     |
| 8k01(H)            | 436.4±3.3                               | 0.90±0.12                            | 0.58±0.05                     |
| 8k02(H)            | 370.8±19.9                              | 1.10±0.07                            | 0.89±0.16                     |
| EPR <sub>C12</sub> | 375.2±5.2                               | 0.90±0.01                            | 0.42±0.03                     |

**Table S2** Effect of copolymer weight on the cytotoxicity of EPR-PEG copolymer 8k02 measured by MTT assay after 48 h incubation with MC3T3-L1 cells

| Polymer dose (mL <sup>-1</sup> ) | 2 mg     | 4 mg     | 10 mg    | 20 mg    | 40 mg    |
|----------------------------------|----------|----------|----------|----------|----------|
| Cell viability (%)               | 94.3±3.6 | 93.3±3.1 | 88.5±2.5 | 84.8±2.5 | 77.5±4.2 |

## References

1. Duan, H.; Wang, Y.; Wang, L.; Min, Y.; Zhang, X.; Du, B. An Investigation of the Selective Chain Scission at Centered Diels–Alder Mechanophore under Ultrasonication. *Macromolecules* 2017, 50, 1353-1361.
